# Supplementary material for: Solid-solution alloy nanoparticles of a combination of immiscible Au and Ru with a large gap of reduction potential and their enhanced oxygen evolution reaction performance
Source: Royal Society of Chemistry journal article supplement (doi:10.1039/c9sc00496c), 2019-01-01
Supplement: c9sc00496c1.pdf [file c9sc00496c1.pdf]

## Supporting Information

### **Solid-solution alloy nanoparticles of a combination of immiscible Au and Ru with a large gap of reduction potential and their enhanced oxygen evolution reaction performance**

*Quan Zhang,<sup>1</sup> Kohei Kusada,<sup>\*,1</sup> Dongshuang Wu,<sup>1</sup> Naoki Ogiwara,<sup>1</sup> Tomokazu Yamamoto,<sup>2,3</sup>  
Takaaki Toriyama,<sup>3</sup> Syo Matsumura,<sup>2,3,4</sup> Shogo Kawaguchi,<sup>5</sup> Yoshiki Kubota,<sup>6</sup> Tetsuo Honma,<sup>5</sup>  
and Hiroshi Kitagawa<sup>\*,1,4</sup>*

<sup>1</sup>Division of Chemistry, Graduate School of Science, Kyoto University, Kitashirakawa-Oiwakecho, Sakyo-ku, Kyoto 606-8502, Japan

<sup>2</sup>Department of Applied Quantum Physics and Nuclear Engineering, Kyushu University, 744 Motooka, Nishi-ku, Fukuoka 819-0395, Japan

<sup>3</sup>The Ultramicroscopy Research Center, Kyushu University, Motooka 744, Nishi-ku, Fukuoka 819-0395, Japan

<sup>4</sup>INAMORI Frontier Research Center, Kyushu University, Motooka 744, Nishi-ku, Fukuoka 819-0395, Japan

<sup>5</sup>Japan Synchrotron Radiation Research Institute (JASRI), SPring-8, 1-1-1 Kouto, Sayo-cho, Sayo-gun, Hyogo 679-5198, Japan

<sup>6</sup>Department of Physical Science, Graduate School of Science, Osaka Prefecture University, 1-1 Gakuen-cho, Naka-ku, Sakai, Osaka 599-8531, Japan

kitagawa@kuchem.kyoto-u.ac.jp; kusada@kuchem.kyoto-u.ac.jp

## 1. Experimental Procedures

### Synthesis of $\text{Au}_x\text{Ru}_{1-x}$ NPs

The  $\text{Au}_x\text{Ru}_{1-x}$  alloy NPs were prepared through a polyol reduction method. First, hydrogen tetrabromaurate (III) hydrate ( $\text{HAuBr}_4 \cdot n\text{H}_2\text{O}$ , Alfa Aesar) and potassium pentachloronitrosylruthenate (II) ( $\text{K}_2\text{Ru}(\text{NO})\text{Cl}_5$ , Aldrich) were dissolved into 10 ml diethylene glycol (DEG, Wako) with an appropriate molar ratio ( $x = 0.1, 0.3, 0.5, 0.7, 0.9$ . The total amount of the precursors is 0.1 mmol). Then, the metal precursor solution was slowly dropped into 100 ml ethylene glycol (EG, Wako) solution containing 444 mg poly(vinylpyrrolidone) (PVP, 444 mg, MW  $\approx 40\,000$ , Wako) at 190 °C. The temperature of the solution was maintained at approximately 190 °C during the dropping process. After that, the solution was kept at 190 °C for another 10 min. Then, the NPs were separated by centrifuging after cooling to room temperature.

### Characterizations

Transmission electron microscopy (TEM) images were acquired through a Hitachi HT7700 operated at 100 kV. The high-angle annular dark-field scanning transmission electron microscopy (HAADF-STEM) images and energy-dispersive X-ray spectroscopy (EDX) spectra were obtained on a JEOL JEM-ARM200CF STEM instrument operated at 200 kV. X-ray fluorescence spectroscopy (XRF) was measured using a Rigaku ZSX Primus IV. Synchrotron X-ray diffraction (XRD) patterns were measured at the BL02B2 beamline, SPring-8 at room temperature. The radiation wavelength was 0.58068(1) Å. The Rietveld refinements were performed by using TOPAS3 software developed by Bruker AXS GmbH. X-ray photoelectron spectroscopy (XPS) spectra were obtained by using a Shimadzu ESCA-3400 X-ray photoelectron spectrometer. The Au  $L_3$ -edge and Ru  $K$ -edge X-ray absorption near edge structure

(XANES) were collected in the transmission mode under ambient conditions using a Si (311) double-crystal monochromator at the BL14B2 beamline, SPring-8. The samples are finely ground in powder, mixed with a boron nitride powder in a suitable ratio and pressed into pellets for XANES measurement.

### Electrochemical Measurements

Electrochemical characterization was conducted by using a standard three-electrode system. A Pt wire and an Ag/AgCl (3.5 M NaCl) electrode were used as the counter and reference electrodes, respectively. A CHI 760E electrochemical analyzer (CH Instruments) was used for recording the electrochemical data. To measure the catalytic properties, the  $\text{Au}_x\text{Ru}_{1-x}$  solids-solution NPs were first loaded on the carbon black (VXC 72R) with a 20 wt% of metal. Here, the PVP amounts of the  $\text{Au}_x\text{Ru}_{1-x}$  ( $x = 0, 0.1, 0.3, 0.5, 0.7, 0.9$ , and  $1.0$ ) NPs were determined from the elemental analysis to be 14.5 wt%, 13.7 wt%, 7.2 wt%, 5.7 wt%, 7.9 wt%, 8.5 wt% and 17.3 wt%, respectively. Then, 10 mg catalysts were added to 1 ml mixed solution (300  $\mu\text{l}$  water, 600  $\mu\text{l}$  isopropanol and 100  $\mu\text{l}$  Nafion solution (Sigma Aldrich, 5 wt%)) followed by sonication for 60 min to form a homogeneous ink. The catalyst inks were uniformly cast onto a glassy carbon electrode (5 mm-diameter with a surface area of 0.196  $\text{cm}^2$ ) with a 0.2  $\text{mg cm}^{-2}$  loading for all samples, which was used as a working electrode. All the electrodes were purchased from ALS Co., Ltd. The working electrode surface was polished with 1  $\mu\text{M}$  diamond and 0.05  $\mu\text{M}$  alumina solutions (ALS Co., Ltd.) before loading the catalysts. Before OER catalytic activity testing, the  $\text{H}_2\text{SO}_4$  solutions were purged by Ar for 30 min. Ar was kept flowing above the solution to maintain an inert atmosphere during the measurement. The OER polarization curves were recorded over the potential range +0.95 to +1.5 V (vs. Ag/AgCl) at a scan rate of 5 mV / s. The

working electrode was continuously rotating at 1600 rpm during the measurements. Chronopotentiometric measurements for  $\text{Au}_{0.3}\text{Ru}_{0.7}$  and Ru were carried out under a constant current density of  $2.5 \text{ mA} / \text{cm}^2$  for 1 h. For all measurements, the current density was  $iR$ -corrected using the measured solution resistance. The current density was finally normalized by the surface area of the working electrode.

## 2. Reduction Potentials of Noble Metals

**Table S1.** Reduction Potentials of the Noble Metals Under Standard Conditions (25 °C, 1 atm).

SHE: Standard Hydrogen Electrode <sup>1</sup>

| Reduction reaction                                   | $E^0$ (V vs SHE) |
|------------------------------------------------------|------------------|
| $\text{Ru}^{3+} + 3\text{e}^- \rightarrow \text{Ru}$ | 0.455            |
| $\text{Rh}^{3+} + 3\text{e}^- \rightarrow \text{Rh}$ | 0.758            |
| $\text{Pd}^{2+} + 2\text{e}^- \rightarrow \text{Pd}$ | 0.951            |
| $\text{Ag}^+ + \text{e}^- \rightarrow \text{Ag}$     | 0.800            |
| $\text{Ir}^{3+} + 3\text{e}^- \rightarrow \text{Ir}$ | 1.156            |
| $\text{Pt}^{2+} + 2\text{e}^- \rightarrow \text{Pt}$ | 1.188            |
| $\text{Au}^{3+} + 3\text{e}^- \rightarrow \text{Au}$ | 1.498            |

### 3. Au–Ru Phase Diagram

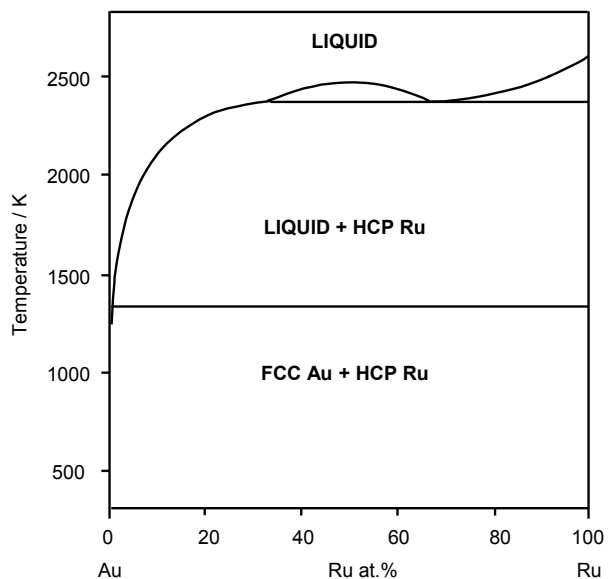

**Figure S1.** Phase diagram of Au–Ru system<sup>2</sup>

### 4. TEM Images of $\text{Au}_x\text{Ru}_{1-x}$ NPs

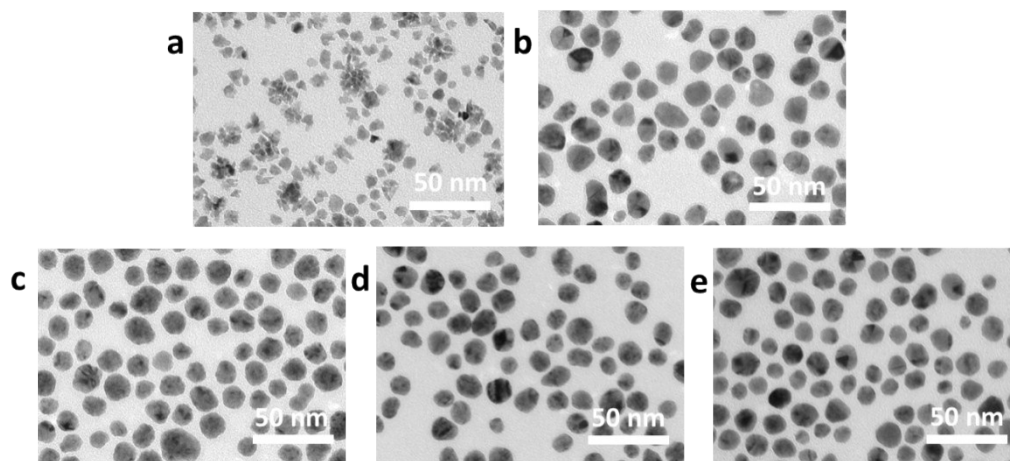

**Figure S2.** TEM images of the  $\text{Au}_x\text{Ru}_{1-x}$  NPs. (a)-(e) are the TEM images of  $\text{Au}_{0.1}\text{Ru}_{0.9}$ ,  $\text{Au}_{0.3}\text{Ru}_{0.7}$ ,  $\text{Au}_{0.5}\text{Ru}_{0.5}$ ,  $\text{Au}_{0.7}\text{Ru}_{0.3}$  and  $\text{Au}_{0.9}\text{Ru}_{0.1}$  NPs respectively.

## 5. Metal Compositions of $\text{Au}_x\text{Ru}_{1-x}$ alloy NPs

**Table S2.** Metal Compositions of  $\text{Au}_x\text{Ru}_{1-x}$  alloy NPs Determined from EDX and XRF Analysis

| Sample        | $\text{Au}_{0.1}\text{Ru}_{0.9}$ | $\text{Au}_{0.3}\text{Ru}_{0.7}$ | $\text{Au}_{0.5}\text{Ru}_{0.5}$ | $\text{Au}_{0.7}\text{Ru}_{0.3}$ | $\text{Au}_{0.9}\text{Ru}_{0.1}$ |
|---------------|----------------------------------|----------------------------------|----------------------------------|----------------------------------|----------------------------------|
| Au : Ru (EDX) | 0.13 : 0.87                      | 0.31 : 0.69                      | 0.51 : 0.49                      | 0.72 : 0.28                      | 0.92 : 0.08                      |
| Au : Ru (XRF) | 0.15 : 0.85                      | 0.32 : 0.68                      | 0.53 : 0.47                      | 0.74 : 0.26                      | 0.93 : 0.07                      |

## 6. STEM-EDX Maps of $\text{Au}_x\text{Ru}_{1-x}$ NPs

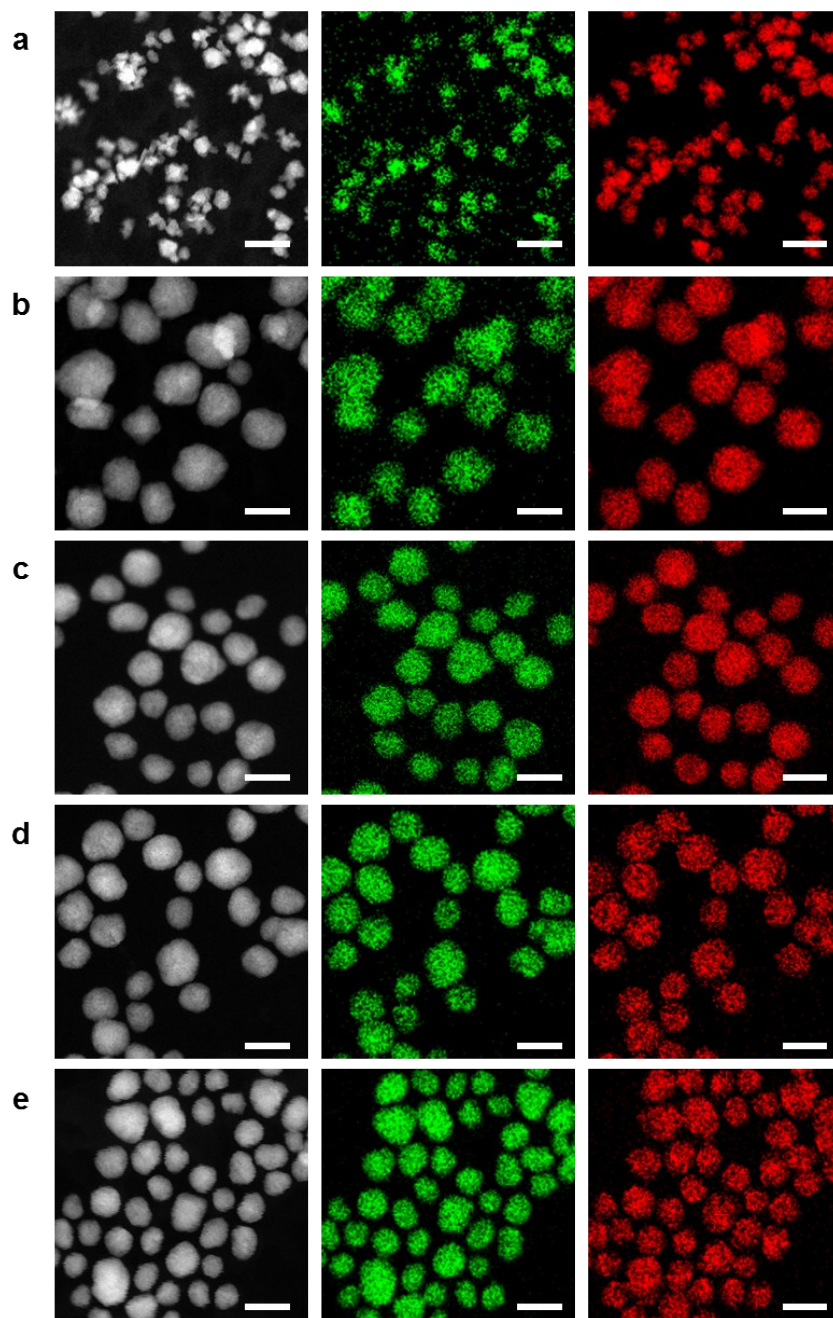

**Figure S3.** HAADF-STEM Images and the corresponding Au-L (green) and Ru-L (red) STEM-EDX maps of (a)  $\text{Au}_{0.1}\text{Ru}_{0.9}$ , (b)  $\text{Au}_{0.3}\text{Ru}_{0.7}$ , (c)  $\text{Au}_{0.5}\text{Ru}_{0.5}$ , (d)  $\text{Au}_{0.7}\text{Ru}_{0.3}$  and (e)  $\text{Au}_{0.9}\text{Ru}_{0.1}$  NPs. The scale bars shown in (a)-(e) are 20 nm.

## 7. Rietveld Refinement of the XRD Patterns for $\text{Au}_x\text{Ru}_{1-x}$ NPs

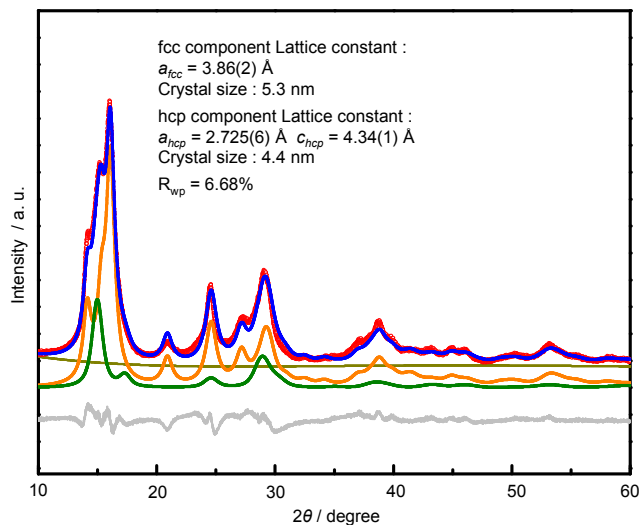

**Figure S4.** Rietveld refinement for  $\text{Au}_{0.1}\text{Ru}_{0.9}$  NPs. The diffraction patterns are shown as red circles. The calculated patterns are shown as the blue line. The difference profile, the background profile, the fitting curves of the fcc components, and the fitting curves of the hcp components are shown as gray, dark yellow, green, and orange lines, respectively.

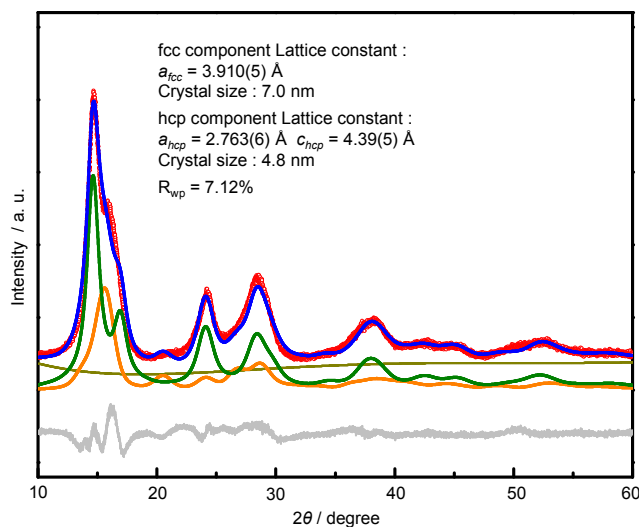

**Figure S5.** Rietveld refinement for  $\text{Au}_{0.3}\text{Ru}_{0.7}$  NPs. The diffraction patterns are shown as red circles. The calculated patterns are shown as the blue line. The difference profile, the background profile, the fitting curves of the fcc components, and the fitting curves of the hcp components are shown as gray, dark yellow, green, and orange lines, respectively.



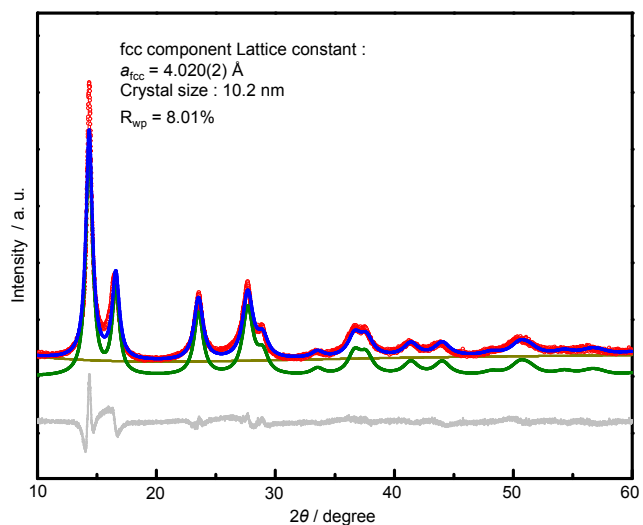

**Figure S6.** Rietveld refinement for  $\text{Au}_{0.7}\text{Ru}_{0.3}$  NPs. The diffraction patterns are shown as red circles. The calculated patterns are shown as the blue line. The difference profile, the background profile, and the fitting curves of the fcc components are shown as gray, dark yellow, and green, respectively.

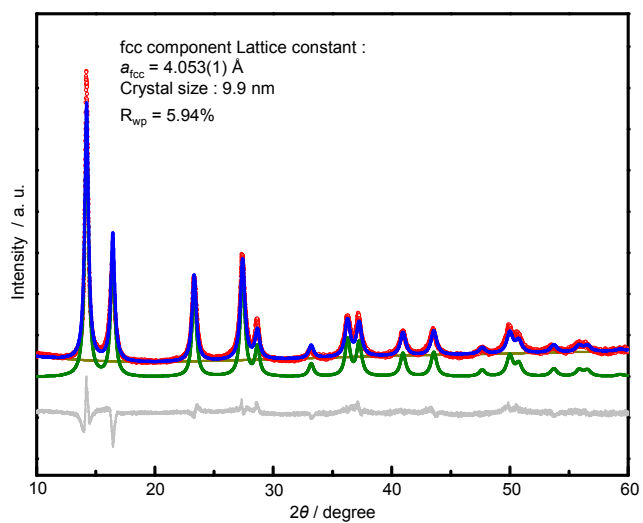

**Figure S7.** Rietveld refinement for  $\text{Au}_{0.9}\text{Ru}_{0.1}$  NPs. The diffraction patterns are shown as red circles. The calculated patterns are shown as the blue line. The difference profile, the background profile, and the fitting curves of the fcc components are shown as gray, dark yellow and green lines, respectively.

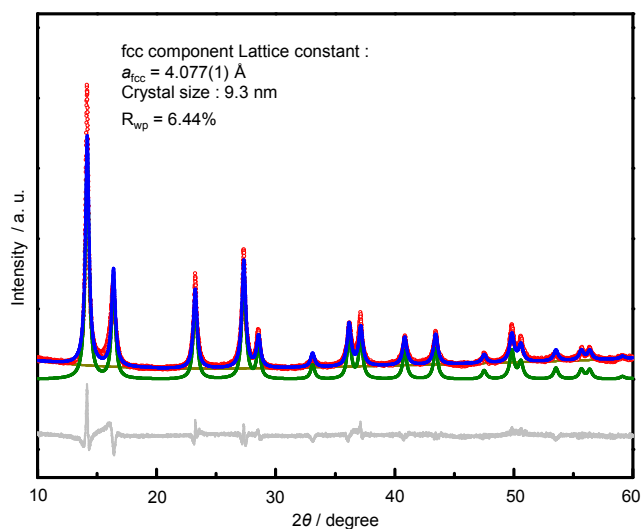

**Figure S8.** Rietveld refinement for Au NPs. The diffraction patterns are shown as red circles. The calculated patterns are shown as a blue line. The difference profile, the background profile, and the fitting curves of the fcc components are shown as gray, dark yellow and green lines, respectively.

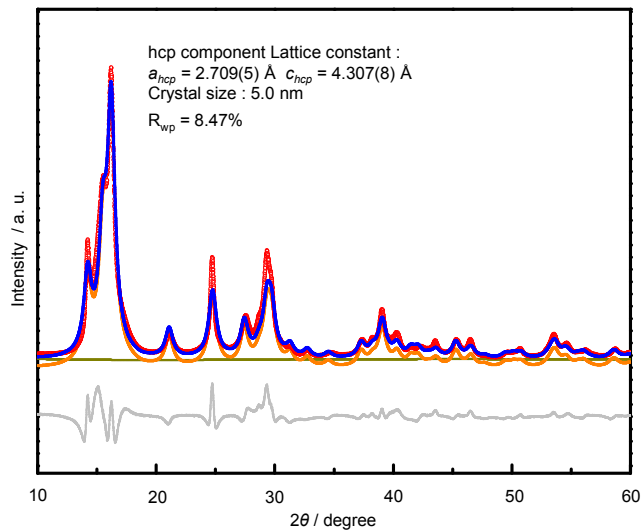

**Figure S9.** Rietveld refinement for Ru NPs. The diffraction patterns are shown as red circles. The calculated patterns are shown as blue line. The difference profile, the background profile, and the fitting curves of the hcp components are shown as gray, dark yellow and orange lines, respectively.

## 8. TEM Images of the $\text{Au}_x\text{Ru}_{1-x}/\text{C}$ Catalysts

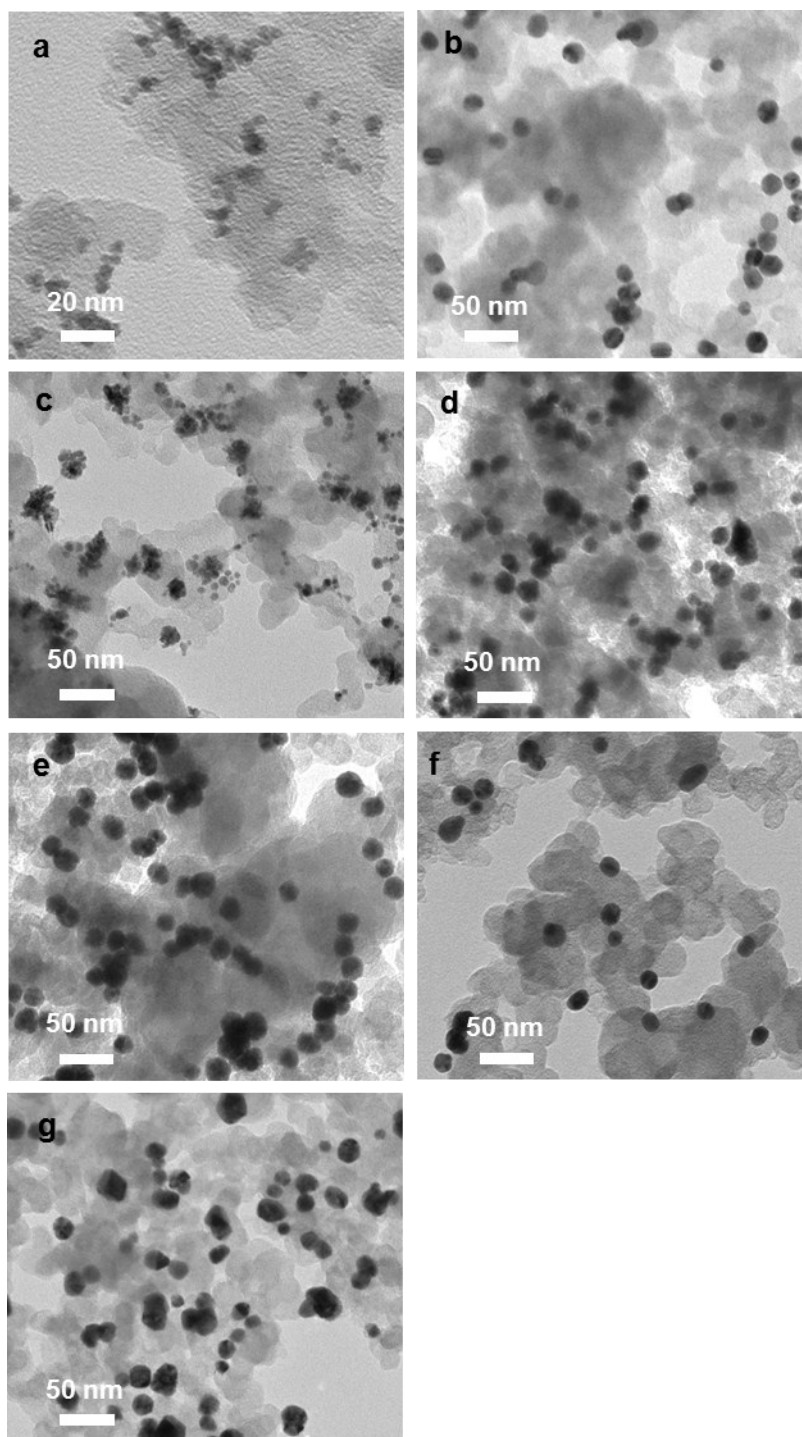

**Figure S10.** TEM images of the  $\text{Au}_x\text{Ru}_{1-x}/\text{C}$  catalysts. (a)–(g) are the TEM images of Ru, Au,  $\text{Au}_{0.1}\text{Ru}_{0.9}$ ,  $\text{Au}_{0.3}\text{Ru}_{0.7}$ ,  $\text{Au}_{0.5}\text{Ru}_{0.5}$ ,  $\text{Au}_{0.7}\text{Ru}_{0.3}$  and  $\text{Au}_{0.9}\text{Ru}_{0.1}$  NPs loading on the carbon black respectively.

## 9. Chronopotentiometric Stability of Ru and Au<sub>0.1</sub>Ru<sub>0.9</sub> Catalysts

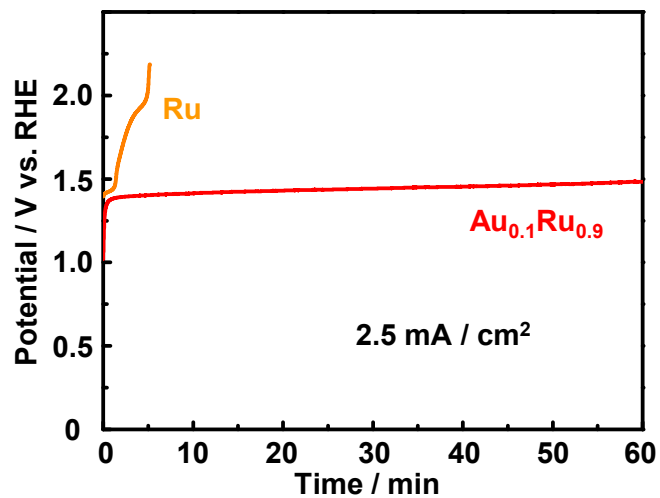

**Figure S11.** Chronopotentiometry curves of Au<sub>0.1</sub>Ru<sub>0.9</sub> catalysts compared to Ru catalyst under constant current density of 2.5 mA/cm<sup>2</sup> for 1 h.

## 10. Structure of the Catalysts after the Chronopotentiometric Stability Measurement

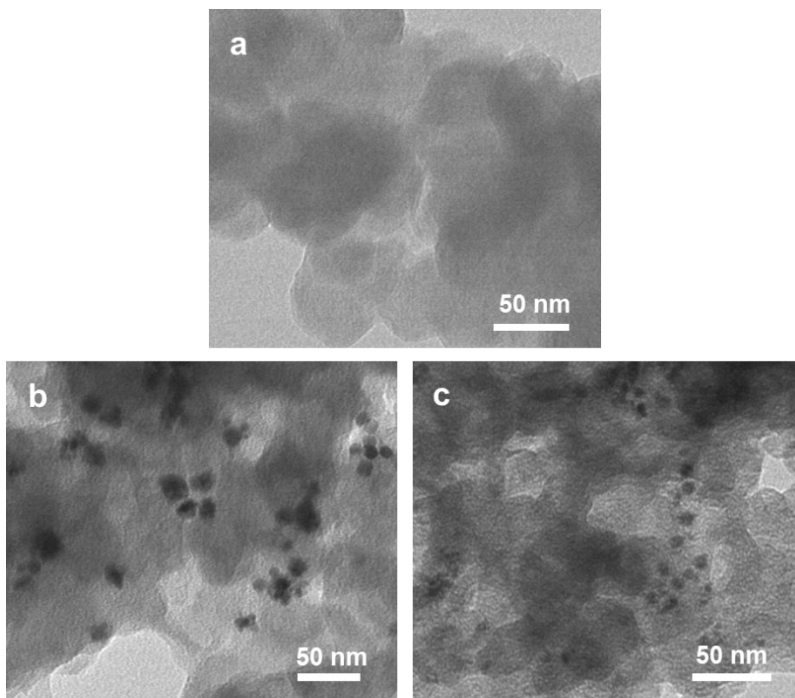

**Figure S12.** TEM images of Ru/C (a), Au<sub>0.3</sub>Ru<sub>0.7</sub>/C (b) and Au<sub>0.1</sub>Ru<sub>0.9</sub>/C (c) catalysts after stability test.

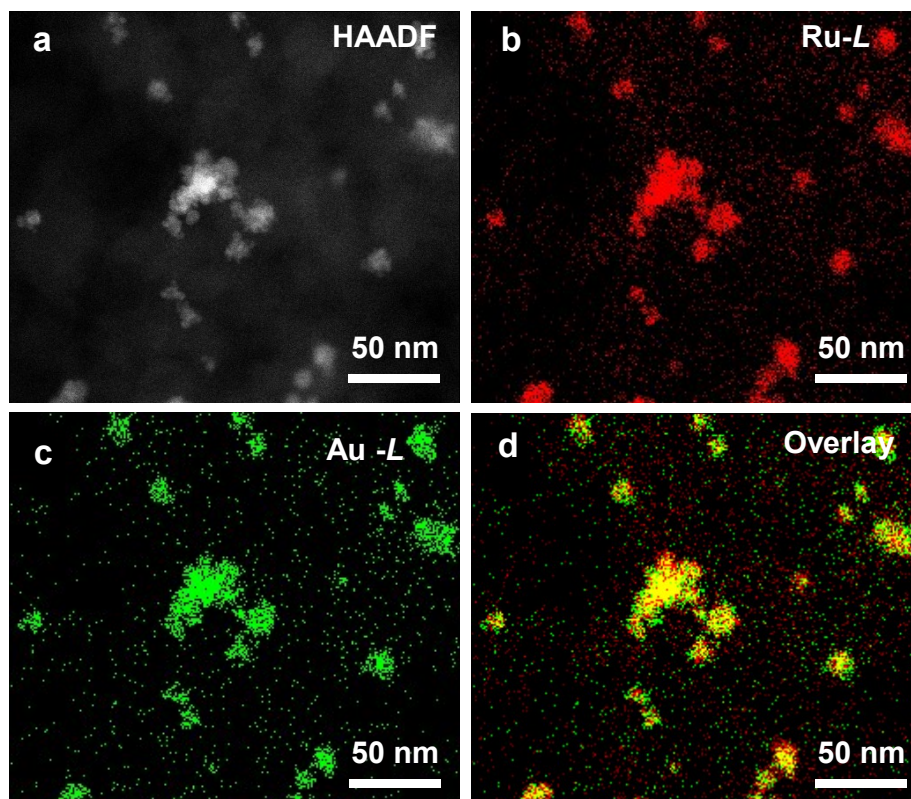

**Figure S13.** STEM images and the EDX maps of the  $\text{Au}_{0.3}\text{Ru}_{0.7}$  catalysts after the chronopotentiometric stability measurement in low magnification. (a) HAADF- STEM image, (b)–(d) the corresponding Ru-L (red), Au-L (green) and overlay STEM–EDX maps of NPs in (a).

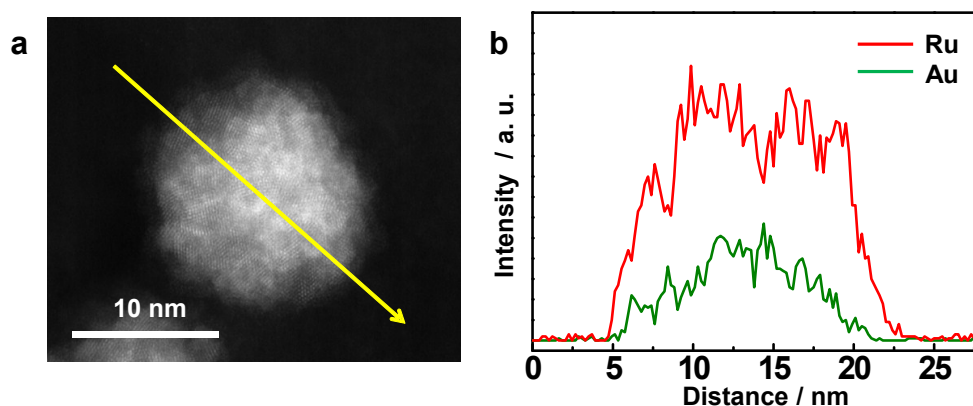

**Figure S14.** (a) HAADF- STEM image of the  $\text{Au}_{0.3}\text{Ru}_{0.7}$  catalysts after the chronopotentiometric stability measurement in low magnification, (b) the EDX line profiles of the NP along the arrow shown in (a).

## 11. XPS Analysis of $\text{Au}_x\text{Ru}_{1-x}$ alloy NPs

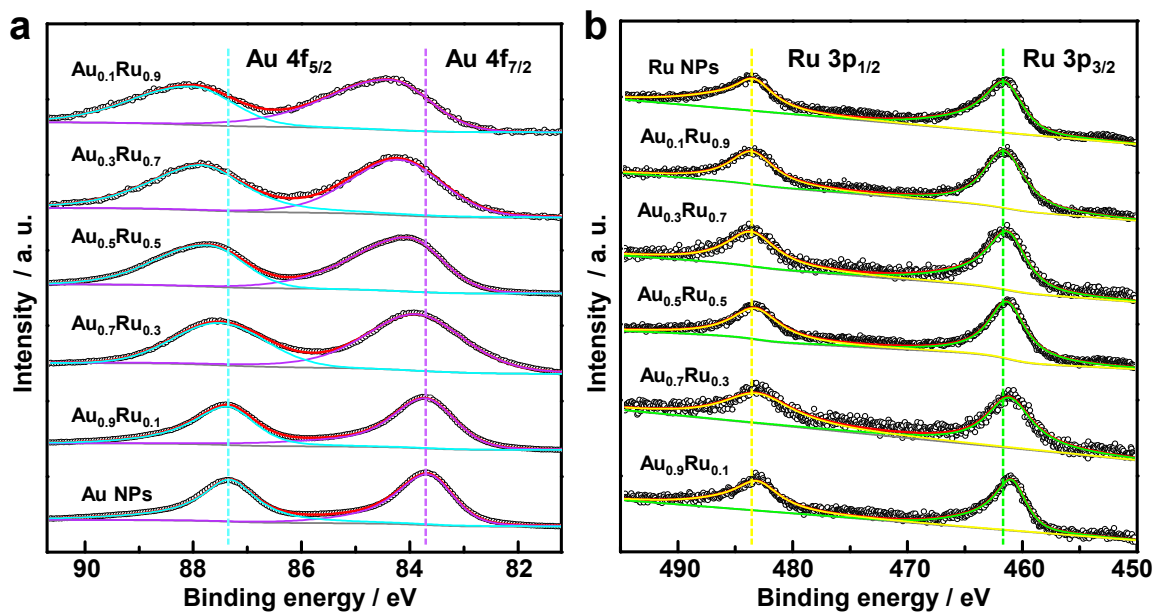

**Figure S15.** (a) Au 4*f* and (b) Ru 3*p* core-level XPS spectra of  $\text{Au}_x\text{Ru}_{1-x}$ , Au and Ru NPs.

**Table S3.** Binding energies of Au 4*f* and Ru 3*p*

| Sample                           | Binding energy (eV)          |                              |                              |                              |
|----------------------------------|------------------------------|------------------------------|------------------------------|------------------------------|
|                                  | Au 4 <i>f</i> <sub>5/2</sub> | Au 4 <i>f</i> <sub>7/2</sub> | Ru 3 <i>p</i> <sub>1/2</sub> | Ru 3 <i>p</i> <sub>3/2</sub> |
| Ru NPs                           |                              |                              | 483.80                       | 461.63                       |
| $\text{Au}_{0.1}\text{Ru}_{0.9}$ | 88.05                        | 84.38                        | 483.69                       | 461.52                       |
| $\text{Au}_{0.3}\text{Ru}_{0.7}$ | 87.89                        | 84.22                        | 483.57                       | 461.38                       |
| $\text{Au}_{0.5}\text{Ru}_{0.5}$ | 87.71                        | 84.04                        | 483.43                       | 461.25                       |
| $\text{Au}_{0.7}\text{Ru}_{0.3}$ | 87.53                        | 83.86                        | 483.33                       | 461.08                       |
| $\text{Au}_{0.9}\text{Ru}_{0.1}$ | 87.40                        | 83.73                        | 483.11                       | 460.94                       |
| Au NPs                           | 87.33                        | 83.65                        |                              |                              |

## 12. Reaction Pathway of OER in Acid Solution

**Table S4.** Overall Reaction Pathway of OER in Acid Solution <sup>3</sup>

| Overall reaction:                                                        | Reaction pathway:                                                                  |
|--------------------------------------------------------------------------|------------------------------------------------------------------------------------|
| $2\text{H}_2\text{O} \rightarrow \text{O}_2 + 4\text{H}^+ + 4\text{e}^-$ | $* + \text{H}_2\text{O} \rightarrow *\text{OH} + \text{H}^+ + \text{e}^-$          |
|                                                                          | $*\text{OH} \rightarrow *\text{O} + \text{H}^+ + \text{e}^-$                       |
|                                                                          | $*\text{O} + \text{H}_2\text{O} \rightarrow *\text{OOH} + \text{H}^+ + \text{e}^-$ |
|                                                                          | $*\text{OOH} \rightarrow *\text{O}_2 + \text{H}^+ + \text{e}^-$                    |
|                                                                          | $*\text{O}_2 \rightarrow * + \text{O}_2$                                           |

The \* represents active site on the metal surface.

## References

- [1] P. Vanýsek, in *CRC Handbook of Chemistry and Physics, 83rd Edition*, (Eds.: D. R. Lide), Taylor & Francis, Boca Raton, Florida, USA **2002**.
- [2] H. Okamoto, T. B. Massalski, *J. Phase Equilib.* **1984**, 5, 388.
- [3] J. Rossmeisl, A. Logadottir, J. K. Nørskov, *Chem. Phy.* **2005**, 319, 178.
